# Supplementary material
Source: PubMed Central journal article supplement (PMC3247014)
Supplement: NIHMS342712-supplement-01.pdf [file NIHMS342712-supplement-01.pdf]

**Item S1. Search Strategy**

We searched Medline (January 2011) using the following search strategy:

Search # 1 and (#2 or #3 or #4 or #5 or #6) Limits: Humans, All Adult: 19+ years

Search # 1 and (#2 or #3 or #4 or #5 or #6) Limits: Humans

Search # 1 and (#2 or #3 or #4 or #5 or #6)

Search chronic renal failure

Search chronic kidney disease

Search end stage renal disease

Search hemodialysis

Search dialysis

Search smoking
